# Supplementary material
Source: MDPI journal article supplement (https://www.mdpi.com/2073-445X/11/9/1524)
Supplement: s1 [file s1]

# List of Prescribed Burn Associations in the Great Plains

Table S1. This table presents the name of each prescribed burn association that is represented in Figure 2. It also notes the State or States and the County or Parish the PBA is active in.

| State        | County       | Prescribed Burn Association |
|--------------|--------------|-----------------------------|
| South Dakota | Gregory      | Mid-Missouri River          |
|              | Lyman        |                             |
| Nebraska     | Greeley      | Central Nebraska            |
|              | Howard       |                             |
|              | Sherman      |                             |
|              | Custer       | Custer                      |
|              | Valley       |                             |
|              | Cedar        | Northeast Nebraska          |
|              | Dixon        |                             |
|              | Knox         |                             |
|              | Pierce       |                             |
|              | Wayne        |                             |
|              | Lancaster    | Tri-County                  |
|              | Saline       |                             |
|              | Seward       |                             |
|              | Colfax       | Elkhorn Valley              |
|              | Cuming       |                             |
|              | Dodge        |                             |
|              | Wayne        |                             |
|              | Banner       | Oregon Trail                |
|              | Morrill      |                             |
|              | Scotts Bluff |                             |
|              | Butler       | Bohemian Alps               |
|              | Saunders     |                             |
|              | Buffalo      | Buffalo/Sherman             |
|              | Sherman      |                             |
|              | Adams        | South Central Nebraska      |
|              | Franklin     |                             |
|              | Harlan       |                             |
|              | Webster      |                             |
|              | Frontier     | Southwestern Nebraska       |
|              | Hayes        |                             |
|              | Hichcock     |                             |
|              | Red Willow   |                             |
|              | Miami        | East Kansas                 |
|              | Jewell       | Jewell County               |
|              | McPherson    | Tri-County                  |
|              | Rice         |                             |
|              | Reno         |                             |

|          |              |                                            |
|----------|--------------|--------------------------------------------|
| Kansas   | Russell      | Russell County                             |
|          | Cloud        | Cloud County                               |
|          | Smith        | Route 36                                   |
|          | Phillips     | Phillips County                            |
|          | Reno         | Ninnescah Valley                           |
|          | Kingman      |                                            |
|          | Rice         | Alan Sleeper                               |
|          | Reno         |                                            |
|          | Stafford     |                                            |
|          | Barton       |                                            |
|          | Harvey       | Sandhills                                  |
|          | Reno         |                                            |
|          | Barber       | Little Mule                                |
|          | Kearney      | West Ark                                   |
|          | Barber       | Gypsum Hills                               |
|          | Clark        | Cherokee Strip                             |
|          | Comanche     |                                            |
| Oklahoma | Woods        | Gypsum Hills                               |
|          | Harper       | Cherokee Strip                             |
|          | Alfalfa      | Alfalfa County                             |
|          | Beaver       | Beaver County                              |
|          | Blaine       | Canadian Rivers                            |
|          | Canadian     |                                            |
|          | Carter       | Arbuckle Rangeland Restoration Association |
|          | Love         |                                            |
|          | Murray       |                                            |
|          | Cleveland    | Land Run                                   |
|          | McClain      |                                            |
|          | Oklahoma     |                                            |
|          | Coal         | Coal County                                |
|          | Coal         | Pontotoc Ridge                             |
|          | Garvin       |                                            |
|          | Hughes       |                                            |
|          | Johnston     |                                            |
|          | McClain      |                                            |
|          | Murray       |                                            |
|          | Pontotoc     |                                            |
|          | Pottowatomie |                                            |
|          | Seminole     |                                            |
|          | Comanche     | Big Pasture                                |
|          | Kiowa        |                                            |
|          | Tillman      |                                            |
|          | Craig        | Indian Territory                           |
|          | Delaware     |                                            |

|  |              |                                               |
|--|--------------|-----------------------------------------------|
|  | Mayes        | Indian Territory                              |
|  | Rogers       |                                               |
|  | Creek        | Creek County                                  |
|  | Dewey        | Northwest Range Fire Management Association   |
|  | Ellis        |                                               |
|  | Woodward     |                                               |
|  | Dewey        | South Canadian                                |
|  | Harper       | Cimarron Range Preservation Association       |
|  | Woods        |                                               |
|  | Woodward     |                                               |
|  | Harper       | Harper County                                 |
|  | Kay          | K-O                                           |
|  | Osage        |                                               |
|  | Lincoln      | Cross Timbers                                 |
|  | Payne        |                                               |
|  | Noble        | North Central Range Improvement Association   |
|  | Payne        |                                               |
|  | Okfuskee     | Twin Rivers                                   |
|  | Pawnee       | Pawnee County                                 |
|  | Pontotoc     | Limestone Game & Range Management Association |
|  | Pottowatomie | Northern Pottowatomie                         |
|  | Pottowatomie | Salt Creek                                    |
|  | Woodward     | Woodward County                               |
|  | Beckham      | Roger Mills                                   |
|  | Roger Mills  |                                               |
|  | Aransas      | Central Basin                                 |
|  | Bee          |                                               |
|  | Calhoun      |                                               |
|  | DeWitt       |                                               |
|  | Goliad       |                                               |
|  | Jackson      |                                               |
|  | Karnes       |                                               |
|  | Live Oak     |                                               |
|  | Mason        |                                               |
|  | Nueces       |                                               |
|  | Refugio      |                                               |
|  | San Patricio |                                               |
|  | Victoria     |                                               |
|  | Coryell      | Cross Timbers                                 |
|  | Hamilton     |                                               |
|  | Burnet       |                                               |
|  | Concho       |                                               |
|  | Coryell      |                                               |
|  | Crockett     |                                               |

|              |                     |
|--------------|---------------------|
| Edwards      | Edwards Plateau     |
| Gillespie    |                     |
| Hamilton     |                     |
| Kimble       |                     |
| Lampasas     |                     |
| Llano        |                     |
| Mason        |                     |
| McCulloch    |                     |
| Menard       |                     |
| Schleicher   |                     |
| Sutton       |                     |
| Tom Green    |                     |
| Val Verde    |                     |
| Bandera      | Hill Country        |
| Blanco       |                     |
| Kendall      |                     |
| Kerr         |                     |
| Archer       | North Central       |
| Clay         |                     |
| Jack         |                     |
| Montague     |                     |
| Palo Pinto   |                     |
| Shackelford  |                     |
| Stephens     |                     |
| Throckmorton |                     |
| Wichita      |                     |
| Young        |                     |
| Bowie        | Northeast Texas     |
| Cass         |                     |
| Delta        |                     |
| Franklin     |                     |
| Hopkins      |                     |
| Lamar        |                     |
| Morris       |                     |
| Red River    |                     |
| Titus        |                     |
| Hemphill     | Roger Mills         |
| Wheeler      |                     |
| Austin       | South Central Texas |
| Bastrop      |                     |
| Burleson     |                     |
| Colorado     |                     |
| Fayette      |                     |
| Lee          |                     |

Texas

|               |                         |
|---------------|-------------------------|
| Waller        | South Texas             |
| Washington    |                         |
| Brooks        |                         |
| Cameron       |                         |
| Duval         |                         |
| Hidalgo       |                         |
| Jim Hogg      |                         |
| Jim Wells     |                         |
| Kenedy        |                         |
| Kleberg       |                         |
| Starr         |                         |
| Webb          |                         |
| Willacy       |                         |
| Zapata        |                         |
| Baylor        | Southern Rolling Plains |
| Borden        |                         |
| Cottle        |                         |
| Crosby        |                         |
| Dickens       |                         |
| Fisher        |                         |
| Foard         |                         |
| Garza         |                         |
| Hardeman      |                         |
| Haskell       |                         |
| Jones         |                         |
| Kent          |                         |
| King          |                         |
| Knox          |                         |
| Lubbock       |                         |
| Motley        |                         |
| Nolan         |                         |
| Scurry        |                         |
| Stonewall     |                         |
| Wilbarger     |                         |
| Kinney        | Southwest Texas         |
| Medina        |                         |
| Uvalde        |                         |
| Zavala        |                         |
| Armstrong     |                         |
| Briscoe       |                         |
| Carson        |                         |
| Castro        |                         |
| Childress     |                         |
| Collingsworth |                         |

|          |            |                                        |
|----------|------------|----------------------------------------|
|          | Dallam     | Texas Panhandle                        |
|          | Deaf Smith |                                        |
|          | Donley     |                                        |
|          | Gray       |                                        |
|          | Hall       |                                        |
|          | Hansford   |                                        |
|          | Hartley    |                                        |
|          | Hemphill   |                                        |
|          | Hutchinson |                                        |
|          | Lipscomb   |                                        |
|          | Moore      |                                        |
|          | Ochiltree  |                                        |
|          | Oldham     |                                        |
|          | Parmer     |                                        |
|          | Potter     |                                        |
|          | Randall    |                                        |
|          | Roberts    |                                        |
|          | Sherman    |                                        |
|          | Swisher    |                                        |
|          | Wheeler    |                                        |
|          | Brewster   | Trans-Pecos                            |
|          | Culberson  |                                        |
|          | El Paso    |                                        |
|          | Hudspeth   |                                        |
|          | Jeff Davis |                                        |
|          | Pecos      |                                        |
|          | Presidio   |                                        |
|          | Reeves     |                                        |
|          | Terrell    |                                        |
|          | Navarro    | W Navarro Bobwhite Recovery Initiative |
| Missouri | Franklin   | East Central                           |
|          | Gasconade  |                                        |
|          | St. Louis  |                                        |
|          | Warren     |                                        |
|          | Washington |                                        |
|          | Bollinger  | Foothills                              |
|          | Perry      |                                        |
|          | Macon      | Mark Twain                             |
|          | Audrain    |                                        |
|          | Marion     |                                        |
|          | Ralls      |                                        |
|          | Randolph   |                                        |
|          | Shelby     |                                        |
|          | Carter     | Ozark                                  |

|             |            |                        |
|-------------|------------|------------------------|
|             | Bates      | Upper Osage            |
|             | Cedar      |                        |
|             | Henry      |                        |
|             | St. Clair  |                        |
|             | Vernon     |                        |
| Arkansas    | Cleburne   | Central Arkansas       |
|             | Conway     |                        |
|             | Faulkner   |                        |
|             | Grant      |                        |
|             | Lonoke     |                        |
|             | Perry      |                        |
|             | Pope       |                        |
|             | Pulaski    |                        |
|             | Saline     |                        |
|             | Van Buren  |                        |
|             | White      |                        |
|             | Boone      | North Central Arkansas |
|             | Baxter     |                        |
|             | Marion     |                        |
|             | Searcy     |                        |
|             | Benton     | Ozark Prairie          |
|             | Carroll    |                        |
|             | Crawford   |                        |
|             | Madison    |                        |
|             | Washington |                        |
|             | Fulton     | Piney Hills            |
|             | Izard      |                        |
|             | Sharp      |                        |
|             | Stone      |                        |
| Louisiana   | Lincoln    | Piney Hills            |
|             | Bienville  |                        |
|             | Claiborne  |                        |
|             | Jackson    |                        |
|             | Union      |                        |
|             | Beauregard | Southwest Louisiana    |
|             | Calcasieu  |                        |
|             | Rapides    |                        |
|             | Sabine     |                        |
|             | Vernon     |                        |
| Mississippi | Marshall   | Coldwater              |
|             | Benton     |                        |
|             | Desoto     |                        |
|             | Tate       |                        |
|             | Gallatin   |                        |

|          |            |                       |
|----------|------------|-----------------------|
| Illinois | Hamilton   | Southeastern Illinois |
|          | Hardin     |                       |
|          | Jackson    |                       |
|          | Johnson    |                       |
|          | Massac     |                       |
|          | Pope       |                       |
|          | Pulaski    |                       |
|          | Saline     |                       |
|          | Union      |                       |
|          | Williamson |                       |
| Colorado | Las Animas | Kim-Branson           |
